# Supplementary material for: Calibrated ensemble forecasts of the height of new snow using quantile regression forests and Ensemble Model Output Statistics
Source: Copernicus journal article supplement (doi:10.5194/npg-2021-18), 2021-04-28
Supplement: Supplementary file [file npg-2021-18-EC2-supplement.pdf]

Comment 3.3 of Reviewer #3 mentions sharpness of the probability distributions produced by the various algorithms considered in the paper. The ROC curves shown on Fig. 7 are actually diagnostics of sharpness. They show the extent to which the obtained pdf's are close to the conditions of systematic 'hits' and systematic absence of 'false alarms' (top-left corner of the panels). Those conditions are those of perfect forecasts, *i.e.* perfect sharpness. The figure shows that, by that measure, QRF is at least as good as the other algorithms.
